# Supplementary material
Source: PubMed Central journal article supplement (PMC3033214)
Supplement: NIHMS262560-supplement-Table_3.pdf [file NIHMS262560-supplement-Table_3.pdf]

**Table 3. Positive predictive value (PPV) and negative predictive value (NPV) of PB viral load measurements and hearing outcome in children with asymptomatic congenital cytomegalovirus infection at three different age ranges.**

| Age Range    | PB Viral Load<br>ge/mL | Hearing Outcome |        | PPV, %<br>(CI)     | NPV, %<br>(CI)    |
|--------------|------------------------|-----------------|--------|--------------------|-------------------|
|              |                        | SNHL            | Normal |                    |                   |
|              |                        | <2 months       | ≤3,500 |                    |                   |
|              | >3,500                 | 3               | 35     |                    |                   |
| 2-12 months  | ≤3,500                 | 0               | 26     | 7.7<br>(0.95-25.1) | 100<br>(86.8-100) |
|              | >3,500                 | 2               | 24     |                    |                   |
| 12-36 months | ≤3,500                 | 0               | 25     | 11.8<br>(1.5-36.4) | 100<br>(86.3-100) |
|              | >3,500                 | 2               | 15     |                    |                   |
